# Supplementary material for: RecombineX: A generalized computational framework for automatic high-throughput gamete genotyping and tetrad-based recombination analysis
Source: PubMed Central journal article supplement (PMC9119626; doi:10.1371/journal.pgen.1010047), 2022-05-09
Supplement: pgen.1010047.s019.pdf [file pgen.1010047.s019.pdf]

```
#####  
###          ###  
###      Welcome to RecombineX          ###  
###          ###  
#####
```

[2022-03-14 11:50:59] Installation starts ...

[2022-03-14 11:50:59] Defaulting to 2 concurrent jobs when executing make. Override with  
MAKE\_JOBS=<NUM>

[2022-03-14 11:50:59] Detected previously generated build directory.

[2022-03-14 11:50:59] Download and install all the dependencies ...

[2022-03-14 11:50:59] Installing Perl modules ...

remove previously failed installation in build//Applications/RecombineX/build/cpanm

--2022-03-14 11:50:59-- https://cpanmin.us/

Resolving cpanmin.us (cpanmin.us)... 151.101.194.217, 151.101.66.217, 151.101.2.217, ...

Connecting to cpanmin.us (cpanmin.us)|151.101.194.217|:443... connected.

HTTP request sent, awaiting response... 200 OK

Length: 302543 (295K) [text/plain]

Saving to: 'STDOUT'

-

```
100%[=====]  
=====>] 295.45K --.-KB/s  in 0.004s
```

2022-03-14 11:50:59 (67.2 MB/s) - written to stdout [302543/302543]

--> Working on Test::More

Fetching http://backpan.perl.org/authors/id/E/EX/EXODIST/Test-Simple-1.302086.tar.gz ...

OK

Configuring Test-Simple-1.302086 ... OK

Building and testing Test-Simple-1.302086 ... OK

Successfully installed Test-Simple-1.302086 (downgraded from 1.302162)

1 distribution installed

Text::Soundex is up to date. (3.05)

Env is up to date. (1.04)

--> Working on Statistics::Descriptive

Fetching http://backpan.perl.org/authors/id/S/SH/SHLOMIF/Statistics-Descriptive-

3.0612.tar.gz ... OK

Configuring Statistics-Descriptive-3.0612 ... OK

Building and testing Statistics-Descriptive-3.0612 ... OK

Successfully installed Statistics-Descriptive-3.0612  
1 distribution installed  
--> Working on Statistics::Descriptive::Discrete  
Fetching <http://backpan.perl.org/authors/id/R/RH/RHETTBULL/Statistics-Descriptive-Discrete-0.07.tar.gz> ... OK  
Configuring Statistics-Descriptive-Discrete-0.07 ... OK  
Building and testing Statistics-Descriptive-Discrete-0.07 ... OK  
Successfully installed Statistics-Descriptive-Discrete-0.07  
1 distribution installed  
--> Working on Math::Random  
Fetching <http://www.cpan.org/authors/id/G/GR/GROMMEL/Math-Random-0.72.tar.gz> ... OK  
Configuring Math-Random-0.72 ... OK  
Building and testing Math-Random-0.72 ... FAIL  
! Installing Math::Random failed. See  
</Users/myname/.cpanm/work/1647258699.47395/build.log> for details. Retry with --force to force install it.

###

Building BEDTools:

```
=====
* Creating BamTools API
DETECTED_VERSION = v2.27.1
CURRENT_VERSION =
Updating version file.
- Building in src/utils/FileRecordTools
- Building in src/utils/FileRecordTools/FileReaders
  * compiling FileRecordMgr.cpp
  * compiling FileReader.cpp
In file included from FileReader.cpp:1:
In file included from
/Applications/Xcode.app/Contents/Developer/Platforms/MacOSX.platform/Developer/SDKs
/MacOSX.sdk/usr/include/c++/v1/iostream:37:
In file included from
/Applications/Xcode.app/Contents/Developer/Platforms/MacOSX.platform/Developer/SDKs
/MacOSX.sdk/usr/include/c++/v1/ios:215:
In file included from
/Applications/Xcode.app/Contents/Developer/Platforms/MacOSX.platform/Developer/SDKs
/MacOSX.sdk/usr/include/c++/v1/__locale:15:
In file included from
/Applications/Xcode.app/Contents/Developer/Platforms/MacOSX.platform/Developer/SDKs
/MacOSX.sdk/usr/include/c++/v1/string:511:
In file included from
/Applications/Xcode.app/Contents/Developer/Platforms/MacOSX.platform/Developer/SDKs
/MacOSX.sdk/usr/include/c++/v1/string_view:179:
```

In file included from  
/Applications/Xcode.app/Contents/Developer/Platforms/MacOSX.platform/Developer/SDKs  
/MacOSX.sdk/usr/include/c++/v1/\_\_string:57:  
In file included from  
/Applications/Xcode.app/Contents/Developer/Platforms/MacOSX.platform/Developer/SDKs  
/MacOSX.sdk/usr/include/c++/v1/algorithm:649:  
In file included from  
/Applications/Xcode.app/Contents/Developer/Platforms/MacOSX.platform/Developer/SDKs  
/MacOSX.sdk/usr/include/c++/v1/initializer\_list:46:  
In file included from  
/Applications/Xcode.app/Contents/Developer/Platforms/MacOSX.platform/Developer/SDKs  
/MacOSX.sdk/usr/include/c++/v1/cstddef:37:  
../../../../utils//gzstream/version:1:1: error: expected unqualified-id  
1.5 (08 Jan 2003)  
^

###

In file included from FileReader.cpp:1:  
In file included from  
/Applications/Xcode.app/Contents/Developer/Platforms/MacOSX.platform/Developer/SDKs  
/MacOSX.sdk/usr/include/c++/v1/iostream:39:  
In file included from  
/Applications/Xcode.app/Contents/Developer/Platforms/MacOSX.platform/Developer/SDKs  
/MacOSX.sdk/usr/include/c++/v1/istream:163:  
In file included from  
/Applications/Xcode.app/Contents/Developer/Platforms/MacOSX.platform/Developer/SDKs  
/MacOSX.sdk/usr/include/c++/v1/ostream:142:  
../../../../utils//gzstream/version:1:1: error: expected unqualified-id  
1.5 (08 Jan 2003)  
^

fatal error: too many errors emitted, stopping now [-ferror-limit=]  
20 errors generated.

###

In file included from SingleLineDelimTextFileReader.cpp:1:  
In file included from ./SingleLineDelimTextFileReader.h:11:  
In file included from  
/Applications/Xcode.app/Contents/Developer/Platforms/MacOSX.platform/Developer/SDKs  
/MacOSX.sdk/usr/include/c++/v1/algorithm:653:  
In file included from  
/Applications/Xcode.app/Contents/Developer/Platforms/MacOSX.platform/Developer/SDKs  
/MacOSX.sdk/usr/include/c++/v1/memory:687:  
/Applications/Xcode.app/Contents/Developer/Platforms/MacOSX.platform/Developer/SDKs  
/MacOSX.sdk/usr/include/c++/v1/atomic:1055:73: error: unknown type name 'ptrdiff\_t'

```
_Tp* __cxx_atomic_fetch_add(__cxx_atomic_base_impl<_Tp*> volatile* __a, ptrdiff_t  
__delta, memory_order __order) _NOEXCEPT {
```

^

```
/Applications/Xcode.app/Contents/Developer/Platforms/MacOSX.platform/Developer/SDKs  
/MacOSX.sdk/usr/include/c++/v1/atomic:1060:65: error: unknown type name 'ptrdiff_t'  
_Tp* __cxx_atomic_fetch_add(__cxx_atomic_base_impl<_Tp*> * __a, ptrdiff_t __delta,  
memory_order __order) _NOEXCEPT {
```

^

fatal error: too many errors emitted, stopping now [-ferror-limit=]

20 errors generated.

make[2]: \*\*\* [../../../../../obj//SingleLineDelimTextFileReader.o] Error 1

make[1]: \*\*\* [FileReaders] Error 2

make[1]: \*\*\* Waiting for unfinished jobs....

\* compiling EmptyRecord.cpp

\* compiling Bed3Interval.cpp

\* compiling Bed4Interval.cpp

\* compiling BedGraphInterval.cpp

\* compiling Bed5Interval.cpp

\* compiling Bed6Interval.cpp

\* compiling PlusFields.cpp

\* compiling BedPlusInterval.cpp

\* compiling Bed12Interval.cpp

\* compiling BamRecord.cpp

\* compiling GffRecord.cpp

\* compiling GffPlusRecord.cpp

\* compiling VcfRecord.cpp

\* compiling NoPosPlusRecord.cpp

\* compiling BlockMgr.cpp

\* compiling StrandQueue.cpp

\* compiling RecordMgr.cpp

\* compiling RecordList.cpp

\* compiling RecordKeyList.cpp

\* compiling RecordKeyVector.cpp

make: \*\*\* [src/utils/FileRecordTools] Error 2

###

No env.sh file was created
